# Supplementary material for: A strength-oriented exercise session required more recovery time than a power-oriented exercise session with equal work
Source: PeerJ. 2020 Sep 30;8:e10044. doi: 10.7717/peerj.10044 (PMC7532781; doi:10.7717/peerj.10044)
Supplement: Data 1 [file peerj-08-10044-s001.xlsx]

## Sheet: Sheet1
		SJpeakpower	SJpeakpower	SJpeakpower	SJpeakpower	SJpeakpower	SJmeanpower	SJmeanpower	SJmeanpower	SJmeanpower	SJmeanpower	Sjduration	Sjduration	Sjduration	Sjduration	Sjduration	SJheight	SJheight	SJheight	SJheight	SJheight	SJpeakforce	SJpeakforce	SJpeakforce	SJpeakforce	SJpeakforce	SJRFDmaks	SJRFDmaks	SJRFDmaks	SJRFDmaks	SJRFDmaks	Bench estimated1RM	Bench estimated1RM	Bench estimated1RM	Bench estimated peak power	Bench estimated peak power	Bench estimated peak power	CMJbreaktime	CMJbreaktime	CMJbreaktime	CMJbreaktime	CMJbreaktime	CMJbreakforce	CMJbreakforce	CMJbreakforce	CMJbreakforce	CMJbreakforce	CMJdepth	CMJdepth
		Fam	Pre	Post0	Post24	Post48	Fam	Pre	Post0	Post24	Post48	Fam	Pre	Post0	Post24	Post48	Fam	Pre	Post0	Post24	Post48	Fam	Pre	Post0	Post24	Post48	Fam	Pre	Post0	Post24	Post48	Pre	Post24	Post48	Pre	Post24	Post48	Fam	Pre	Post0	Post24	Post48	Fam	Pre	Post0	Post24	Post48	Fam	Pre
601	Power	2888.4	2780.03	2787.1	2804.48	2910.26	933.395	812.48	767.44	877.485	892.04	0.335	0.4	0.41	0.385	0.375	36.515	36.975	36.8	39.665	40.305	2201.11	2134.18	2083.77	2042.23	2086.38	10561.1	7731.74	7080.64	8598.98	8898.59	123.4	122.4	124.5	551	567.9	567.9	0.16	0.175	0.19	0.19	0.21	2318.36	2222.19	1930.66	2084.6	1953.49	40.615	-41.19
603	Power	3007.51	2656.89	2424.14	2578.98	2656.78	830	648.385	607.42	693.77	635.01	0.36	0.47	0.475	0.44	0.505	36.895	36.75	34.52	37.065	38.76	2141.22	1945.79	1858.74	1900.59	1904.7	8782.55	6789.68	5620.72	6109.89	5846.48	100.2	98.9	97.22	635.5	612.9	601.6	0.2	0.225	0.255	0.245	0.255	1955.87	1840.56	1716.65	1763.36	1723.47	38.575	-44.78
604	Power	1591.04	1772.24	1652.36	1687.62	1572.95	465.91	503.335	405.885	461.54	427.95	0.355	0.365	0.44	0.4	0.415	26.28	28	27.14	27.9	27.005	1485.43	1564.45	1515.24	1523.68	1463.64	6289.55	6906.05	7279.34	7765.06	6519.75	66.6	57.2	59.9	259.7	268	309	0.165	0.16	0.195	0.185	0.165	1579.19	1654.62	1478.78	1525.14	1663.62	33.375	-35.305
605	Power	2350.82	2424.38	2298.16	2367.6	2491.91	813.6	834.715	781.605	602.905	817.93	0.345	0.36	0.365	0.475	0.37	37.06	38.925	36.725	36.805	39.685	1854.1	1822.09	1806.62	1808.32	1804.33	9901.21	7368.23	9254.49	8197.06	9254.78	102.2	101.3	100.7	564.8	490.9	539.1	0.165	0.15	0.17	0.16	0.13	2099.8	2267.44	2097.11	2210.24	2497.13	40.16	-44.665
606	Power	1476.7	1420.03	1358.79	1350.39	1329.28	482.17	449.96	414.83	375.705	369.47	0.405	0.43	0.445	0.51	0.49	32.17	32.17	31.055	31.29	30.87	1281.6	1228.2	1220.65	1196.57	1210.51	5804.73	5558.41	4260.91	5169.59	4730	54.7	53.3	54.6	232.7	236.1	215.6	0.2	0.18	0.22	0.23	0.245	1339.89	1381.14	1292.02	1225.82	1428.01	37.925	-34.95
607	Power	3303.72	3225.31	3327.51	3197.95	3162.59	1066.21	1057.62	903.005	1040.18	1011.25	0.375	0.38	0.43	0.385	0.39	50.425	51.89	49.04	50.93	50.435	1972.38	1919.28	2029.95	1935.84	1922.42	11511.6	12289.7	8615.78	13238.8	12468.2	88.8	83.9	87.3	528.5	552.9	630	0.175	0.195	0.245	0.22	0.235	2074.51	2082.07	1900.91	1967.28	1944.81	47.145	-48.525
609	Power	3393.3	2568.06	2537.39	2577.45	2568.01	1050.82	706.725	714.095	688.985	701.745	0.295	0.41	0.385	0.405	0.405	40.105	36.755	35.345	36.845	36.555	2233.1	1840.66	1858.97	1866.36	1878.15	14493.9	5950.61	5963.33	6944.22	6771.77	76.8			438.4			0.135	0.135	0.155	0.15	0.15	1966.76	2022.91	1807.04	1930	2066.15	30.395	-33.695
610	Power	1295.66	1311.74	1221.06	1194.02		333.065	347.525	302.465	306.555		0.375	0.39	0.445	0.41		22.07	23.945	23.465	21.935		1350.13	1320.39	1240.03	1262.37		6632.47	6082.4	5326.9	5879.02		50.7	52		261.4	273.2		0.185	0.185	0.17	0.34	0.2	1244.09	1284.01	1342.04	996.725	1310.85	30.75	-34.065
611	Power	1382.11	1418.9	1316.32	1429.43	1380.7	428.69	373.595	330.835	366.635	333.435	0.365	0.365	0.395	0.36	0.395	28.05	23.72	22.085	22.69	22.735	1233.86	1344.37	1307.16	1377.37	1334.69	7791.3	4852.77	5150.67	5072.29	5938.74	51.2	51.7	49.6	247.1	244	243.2	0.245	0.255	0.235	0.21	0.24	1202.43	1152.22	1158.95	1191.39	1175.51	36.565	-39.495
612	Power	2504.93	2510.46	2529.11	2333.72	2465.04	769.905	697.89	745.58	747.385	913.32	0.4	0.46	0.425	0.415	0.365	32.585	34.165	34.07	35.405	37.01	2099.12	2046.98	2054.24	1958.55	2009.39	8559.42	9956.77	7850.74	10725.4	11448.6	134.3		134.2	755.3		859.9	0.24	0.175	0.2	0.19	0.175	2174.94	2510.97	2272.47	2386.16	2452.51	52.35	-48.12
613	Power	1411.1	1525.63	1625.72	1533.01	1565.38	440.945	442.185	456.385	450.785	473.725	0.38	0.4	0.39	0.4	0.39	25.01	26.375	26.31	27.425	27.355	1417.12	1458.95	1520.5	1442.11	1447.88	6590.06	5381.34	5991.85	6352.47	5370.47	61.1	62	61.9	332	357.2	337	0.195	0.185	0.2	0.22	0.205	1579.07	1612.95	1592.75	1534.23	1609.76	35.19	-36.885
614	Power	1055.83	1050.98	1006.22	959.695	903.72	299.76	277.66	269.79	229.135	250.77	0.455	0.405	0.41	0.48	0.45	23.75	19.565	18.37	18.535	19.33	1158.14	1230.72	1196.59	1161.29	1099.63	3877.86	4332	4714.26	3309.74	4921.75	47.7	48.9	48.8	244	243.7	267.5	0.155	0.15	0.175	0.175	0.2	1524.69	1492.15	1346.31	1413.2	1351.55	32.11	-30.14
615	Power	2517.02	2470.22	2507.35	2524.15	2522.32	899.545	816.58	809.23	729.045	743.91	0.36	0.395	0.395	0.445	0.435	39.645	38.015	38.465	38.065	37.905	1895.74	2014.49	2007.82	1988.35	1975.2	10930	8449.06	9045.31	8657.83	8059.72	116.9	112.4	110.4	666.2	654.5	726.1	0.16	0.155	0.17	0.17	0.19	2460.59	2380.78	2164.64	2253.32	2198.97	37.565	-36.435
617	Power	1834.63	1889.09	1803.39	1882.43	1922.25	597.025	592.81	552.925	599.645	638.26	0.355	0.425	0.41	0.395	0.405	28.335	32.155	30.41	31.055	32.95	1680.84	1619.57	1641.49	1651.31	1629.32	10176.9	9457.78	8849.33	10740.7	10627.8	97.6	97.8	101.4	613.4	628.2	635.8	0.18	0.255	0.29	0.305	0.21	1806.47	1671.82	1577.47	1564.91	1873.8	32.87	-45.77
618	Power	1285.41	1433.88	1383.87	1445.59	1400.97	480.355	449.3	448.34	437.03	428.725	0.325	0.365	0.36	0.38	0.385	26.2	27.875	26.26	27.32	26.92	1289.78	1339.72	1306.63	1346.64	1318.05	9175.46	7618.53	7455.26	6472.85	5694.34	57.4	58.6	58.4	292.6	290.1	288.4	0.16	0.15	0.17	0.21	0.185	1491.72	1498.63	1394.05	1274.05	1403.37	31.735	-31.055
619	Power	1138.76	1221.93	1166.43	1387.02	1396.11	288.77	369.035	345.175	358.685	411.34	0.535	0.445	0.405	0.455	0.405	23.47	25.015	21.68	24.85	25.445	1221.43	1258.05	1287.21	1371.82	1360.45	4144.24	5747.74	5944.39	4022.99	7195.74	47.4	47.5	47.4	309.5	299	300	0.195	0.175	0.195	0.185	0.175	1526.22	1619.63	1477.41	1523.43	1552.45	44.635	-42.365
601	Strength		3020.39	2566.67	2721.09	2756.16		789.965	760.15	811.26	799.025		0.405	0.405	0.37	0.375		37.855	32.28	34.4	38.88		2239.08	2046.53	2110.91	2054.34		8790.45	7771.27	7480	9255.13	123.9	119	121.8	508.7	506.6	489.6		0.17	0.21	0.235	0.195		2131.88	1859.53	1761.97	2016.38		-38.74
603	Strength		2844.61	2582.8	2661.44	2726.15		775.24	635.02	658.635	719.255		0.425	0.485	0.48	0.455		41.21	36.99	37.795	40.78		1970.33	1914.05	1926.36	1905.75		6820.15	6250.92	5793.64	5131.8	101	95.9	101.2	572.3	552.4	593.7		0.195	0.235	0.265	0.255		2060.76	1802.5	1594.45	1691.52		-48.64
604	Strength		1738.68	1630.84	1684.79	1699.24		481.265	426.42	460.255	454.45		0.395	0.42	0.385	0.395		28.65	25.79	27.335	27.615		1539.69	1495.1	1532.43	1514.83		6673.94	6534.56	6190.86	6404.24								0.16	0.195	0.195	0.18		1652.42	1394.45	1443.11	1517.78		-36.385
605	Strength		2312.43	2303.03	2192.14	2198.02		791.505	746.065	748.58	813.695		0.35	0.365	0.37	0.325		35.425	35.51	35.37	34.805		1817.63	1829.25	1749.01	1780.74		8498.81	7969.64	10351.8	12112.1	102.7	92.6	99	527.2	489.7	538.8		0.155	0.16	0.18	0.17		2062.42	2127.1	1995.71	2014.9		-42.415
606	Strength		1409.01	1296.89	1295.08	1299.12		416.71	362.84	349.95	395.525		0.465	0.48	0.505	0.47		31.71	29.09	28.21	29.76		1226.19	1204.95	1220.72	1200.95		4467.16	4780.64	4435.89	4591.48	54.7	50.1	54.3	232.7	249.6	234.2		0.22	0.305	0.3	0.3		1442.48	1146.08	1383.66	1303.22		-48.6
607	Strength		3181.88	2976.16	3314.66	3255.43		1064.3	912.47	1006.9	1047.58		0.365	0.4	0.395	0.39		50.03	47.17	52.45	52.3		1946.46	1909.62	1960.8	1917.88		15222.9	12221.6	12421.2	14102.5	90.5		91.3	689.7		561.5		0.215	0.22	0.205	0.215		1995.76	1820.68	1984.74	1954.8		-45.805
609	Strength		3084.53	2806.74	2477.45	2381.28		1030.68	856.97	652.8	603.1		0.295	0.3	0.43	0.43		41.47	34.21	36.48	33.82		2094.64	2077.79	1818.17	1818.72		13853.5	9681.05	6138.84	4943.72	79	74.5	72.9	482.4	447.9	394.2		0.13	0.14	0.16	0.175		2094.85	1874.02	1813.97	1714.38		-31.98
610	Strength		1231.88	1257.54	1146.22	1151.62		342.18	258.325	280.795	291.44		0.38	0.455	0.445	0.455		23.2	20.765	21.36	22.47		1255.92	1310.91	1188.93	1185.47		4963.24	6568.67	3925.89	4792.93	49	53.2	47.5	274.1	254.6	308.7		0.18	0.18	0.245	0.24		1375.66	1372.43	1108.25	1158.05		-37.27
611	Strength		1369.03	1330.41	1463.86	1380.91		363.91	342.505	372.705	347.195		0.39	0.405	0.365	0.385		24.815	24.025	23.705	23.89		1293.71	1277.2	1381.92	1304.37		4278.16	4974.83	5141.08	4967.54	51.7	53.1	51.8	264.8	246.8	252.7		0.24	0.22	0.25	0.3		1240.62	1174.76	1044.61	1103.76		-43.04
612	Strength		2593.26	2604.69	2609.47	2286.15		794.815	854.34	844.12	718.235		0.43	0.395	0.405	0.44		36.95	36.34	36.65	35.655		2051.16	2056.61	2072.97	1919.28		9901.92	10304.3	10645.4	10263.3	137.8	128.6		736.5	679.1			0.225	0.21	0.2	0.19		2331.4	2302.03	2293.09	2309.97		-51.81
613	Strength		1501.25	1422.95	1573.03	1620.14		397.02	402.815	447.86	467.035		0.425	0.4	0.41	0.395		24.66	24.32	27.09	27.11		1422.13	1406.99	1445.22	1478.59		5478.74	6005.6	5602.89	5612.2	60.3	59.5	61.8	328.5	293.2	321.2		0.23	0.225	0.275	0.3		1523.07	1507.92	1523.23	1292.74		-39.785
614	Strength		1116.05	1088.9	1001.27	1018.15		298.615	304.425	302.15	313.575		0.42	0.405	0.43	0.425		21.03	20.325	21.64	21.98		1220.43	1205.07	1127.17	1132.18		4079.49	4029.36	4683.89	4866.91	50.1	49.1	48.8	282.4	284.6	309.1		0.14	0.15	0.175	0.18		1571.72	1495	1376.9	1420.56		-30.81
615	Strength		2281.4	2240.9	2398.2	2391.06		786.64	661.155	688.31	752.39		0.415	0.455	0.46	0.42		38.84	35.485	36.77	38.155		1885.97	1864.45	1947.47	1935.94		7325.11	7338.03	7454.24	7131.39	111.7	110.3		694.2	663.3			0.16	0.21	0.225	0.18		2360.01	1998.99	1903.59	2205.4		-39.3
617	Strength		1829.71	1755.52	1850.92	1781.51		587.94	434.58	517.42	518.115		0.395	0.455	0.41	0.43		29.925	25.755	27.29	29.025		1658.67	1689.37	1694.24	1641.88		8253.7	6793.24	7436.28	8419.83	97.6	97.7		613.4	517.2			0.21	0.265	0.32	0.225		1705.36	1549.5	1287.51	1708.24		-36.425
618	Strength		1243.62	1320.47	1457.59	1371.07		432.405	417.14	403.495	419.69		0.35	0.345	0.38	0.37		26.385	23.925	25.95	25.13		1266.8	1343.25	1390.21	1308.37		8261.26	6159.48	4203.74	6537.49	65.9	58.2	56.7	312.6	274.7	305.9		0.16	0.165	0.18	0.195		1480.08	1378.51	1379.01	1358.9		-30.44
619	Strength		1295.8	1234.69	1211.96	1287.99		346.485	252.95	324.695	332.195		0.48	0.58	0.485	0.495		25.195	22.485	25.39	24.81		1298.38	1309.16	1258.49	1297.4		5929.39	3874.59	5109.49	4255.17	46.1	47.2	44.7	231.1	237.1	292.2		0.195	0.19	0.18	0.2		1555.97	1531.41	1554.21	1483.08		-40.855
[truncated: 102 more columns]
